# Supplementary material for: A panel of recombinant proteins from human-infective Plasmodium species for serological surveillance
Source: Malar J. 2020 Jan 17;19:31. doi: 10.1186/s12936-020-3111-5 (PMC6969409; doi:10.1186/s12936-020-3111-5)
Supplement: Supplementary file 1 — Additional file 1: Datasets used for the analysis. The ELISA absorbance values used for the data analysis are provided as separate spreadsheets. Patient groups where applicable are numbered: 1—European traveller; 2 and 3—Imported malaria; 4—Native Tanzanian; 5—Control group; 6—Native Malaysian. [file 12936_2020_3111_MOESM1_ESM.xlsx]

## Sheet: Fig1bandc
sampleID	diagnosis_combined	mal-CyRPA	mal-GAMA	mal-MSP10	mal-MSP4	mal-MSP5	mal-P12	mal-P38	mal-P41	mal-MSP3.10	mal-MSP3.5	PmMSP7.1	PmMSP7.4	ova-CyRPA	ova-GAMA	ova-MSP10	ova-MSP4	ova-MSP5	ova-P12	ovaP38	ovaP41	ova-MSP3.5	ova-MSP3.6	ova-MSP7.12	ova-MSP7.8	kno-CyRPA	kno-GAMA	kno-MSP10	kno-MSP4	kno-MSP5	kno-P12	kno-P38	kno-P41	kno-P92
Malawi IgG	n/a	0.201	0.055	0.258	0.376	0.26	0.017	0.122	0.479	0.067	0.041	-0.055	0.067	0.033	0.049	0.257	0.059	-0.014	0.16	0.189	0.66	0.264	0.237	-0.039	-0.027
Pk1	kno																									0.053	0.021	0.035	0.044	0.135	0.603	0.344	0.422	0.019
Pk2	kno																									0.294	0.121	2.088	0.254	0.645	0.548	0.46	0.921	0.159
Pk3	kno																									0.058	0.04	0.011	0.015	0.028	0.217	0.052	0.026	0.016
Pk4	kno																									0.084	0.025	0.67	0.021	0.055	1.081	0.212	0.032	0.049
Pk5	kno																									0.091	0.034	0.04	0.017	0.065	0.239	0.155	0.274	0.024
Pk6	kno																									0.178	0.106	0.621	0.052	0.236	1.06	0.259	0.135	0.088
Pk7	kno																									0.158	0.093	0.53	0.052	0.203	0.379	0.402	0.231	0.096
Pk8	kno																									0.152	0.07	0.106	0.074	0.122	0.553	0.191	0.082	0.06
Pk9	kno																									0.102	0.119	0.158	0.107	0.087	0.617	0.186	0.04	0.049
Pk10	kno																									0.117	0.038	0.171	0.052	0.249	0.442	0.207	0.086	0.03

## Sheet: Fig2and3
Participant Group	diagnosis	fal-MSP1	fal-P92	fal-P12	fal-AMA1	fal-MSP10	fal-MSP3.1	fal-HPZZ	viv-P12	viv-HPZZ	viv-P41	viv-MSP5	viv-P38	viv-MSP7.1	mal-MSP10	mal-MSP5	mal-P41	ova-MSP10	ova-P41	ova-MSP3.5	kno-MSP10	kno-P12	kno-P38	Control	No antigen control
2	viv	0.591	0.44	0.431	0.457333	0.417333	0.395333	1.42467	1.78767	1.78367	1.02933	1.31367	0.613	0.917	0.39	0.528667	0.455333	0.433333	0.671667	0.395	0.453333	0.946333	0.67	0.359333	0.384
2	fal	0.419	1.62533	0.493	0.525	0.521667	0.416	0.458667	0.392333	0.442	0.387	0.386667	0.384667	0.385667	0.395	0.385	0.380333	0.396667	0.371333	0.384	0.381333	0.41	0.391667	0.367333	0.387667
2	fal	1.65367	2.03933	0.490333	0.688333	0.814333	0.468333	0.477667	0.375667	0.459	0.401333	0.417333	0.382667	0.386333	0.589	0.718	0.422	0.432667	0.423	0.389667	0.49	0.393333	0.373667	0.335667	0.371667
2	fal	2.098	2.213	1.54967	1.95533	1.32333	1.20467	1.79	1.418	1.651	0.984333	1.61933	1.289	1.194	1.98033	2.16733	1.858	1.37733	1.832	0.998333	1.24133	1.44133	1.11133	1.126	1.07033
2	fal	2.20733	2.12167	0.901667	1.491	1.491	1.09733	1.13767	0.786333	1.07033	0.660333	0.87	0.58	0.914333	1.096	0.832	0.877667	1.13633	0.863	0.897667	0.774333	1.00467	0.935667	0.558333	0.920667
1	fal	1.48467	0.622333	0.650333	0.658	0.712333	0.619667	0.761667	0.591333	0.606333	0.785333	0.770667	0.612333	0.959333	0.721333	0.759	0.612667	0.671	0.624333	0.621333	0.58	0.821	0.681667	0.477333	0.616667
1	fal	1.39667	0.717	0.849333	1.43033	0.636667	0.589	0.709	0.498	0.537	0.633333	0.444	0.496333	0.487	0.498667	0.572	0.483333	0.550667	0.505333	0.491	1.5	0.583667	0.59	0.451333	0.517333
2	fal	1.746	1.33367	1.342	1.43	1.41633	2.08667	1.33667	1.12367	1.204	0.877667	1.09433	0.672	1.21633	1.19467	1.269	1.21867	1.75533	1.225	1.45333	1.04733	1.487	1.31333	0.719333	1.35267
2	fal	0.869333	0.774667	0.881667	0.855667	1.02067	0.911667	0.840667	0.723333	0.751	0.618333	0.714	0.516333	0.766667	0.793333	0.706667	0.815333	0.873667	0.828	0.848333	0.695	1.04133	0.895	0.532333	0.922333
1	mal	1.05567	1.08333	1.17967	1.15233	1.30233	1.22867	1.44733	1.08167	1.20467	1.06033	1.55933	0.829333	1.21233	1.48467	1.68967	1.22267	1.11433	1.11367	1.189	1.96567	1.88933	1.25333	0.651333	1.28767
2	viv	1.22	0.942667	1.05067	0.964	1.14533	1.37267	1.22833	1.653	1.22333	2.40567	1.105	0.694667	1.07333	1.09367	0.962333	1.06667	1.023	1.06633	1.081	0.821333	1.386	1.13867	0.643333	1.12533
2	fal	2.31167	2.336	1.36967	2.21	2.18833	2.38167	1.918	1.45833	1.56967	0.849667	1.296	0.897333	0.959333	2.117	1.258	2.33933	1.28633	1.492	1.005	1.88267	1.072	0.937333	0.545667	0.92
2	fal	0.831333	0.705333	0.842	0.694667	0.814667	0.749	0.729667	0.681	0.755333	0.609333	0.672	0.470333	0.758	0.729	0.650333	0.744333	0.693333	0.721333	0.758667	0.667	0.907667	0.76	0.494	0.734333
1	mal	0.766	0.553667	0.531667	0.731333	1.352	0.544667	0.709667	0.523667	0.521333	0.494	0.439667	0.505333	1.23567	1.306	0.492	0.512333	0.625333	0.508667	0.528333	0.466	0.524333	0.545333	0.423333	0.489667
1	fal	0.949667	0.543	0.555	0.572333	0.607667	0.544	1.01433	0.545	0.581333	0.552667	0.515667	0.532667	0.533333	0.564667	0.568	0.546667	0.605667	0.546667	0.611667	0.523333	0.556333	0.655	0.476667	0.515
2	fal	1.708	1.89067	0.351333	0.512333	1.14167	0.362	0.350333	0.371	0.388	0.362	0.354667	0.373667	0.361	0.365333	0.371	0.364	0.374667	0.365	0.372	0.359667	0.380667	0.378667	0.372667	0.371667
2	fal	1.79133	1.25133	0.437667	0.587667	0.485667	0.516667	0.700667	0.436333	0.785333	0.406667	0.405	0.405333	0.414	0.415	0.408333	0.380667	0.459667	0.414	0.376667	0.447667	0.409667	0.394667	0.431	0.395333
2	fal	1.38833	1.02	0.398333	1.234	0.449667	0.537333	0.432333	0.389667	0.399333	0.366	0.366333	0.372333	0.363	0.364	0.353333	0.360333	0.364667	0.369667	0.372667	0.387667	0.379	0.382	0.365667	0.373333
2	fal	1.81667	1.22567	0.499333	0.789333	0.964333	0.819333	0.853667	0.518667	0.506333	1.222	0.422667	0.451	0.515	0.442667	0.770667	0.422667	0.705	0.825333	0.405	0.931667	0.570333	0.424667	0.394	0.415333
2	fal	1.84733	0.571	0.438	0.569	0.458333	0.455333	0.442333	0.415333	0.4	0.376667	0.400667	0.401667	0.408667	0.399	0.398	0.388667	0.405	0.432	0.379	0.418	0.453	0.401333	0.368	0.376667
1	fal	1.20533	0.433	0.643	0.484	0.475	0.438333	0.549	0.448	0.473	0.506667	0.431	0.462	0.490333	1.57467	0.539	0.441333	0.478667	0.526	0.458667	0.463333	0.503333	0.478	0.404667	0.466667
1	fal	1.30967	0.500667	0.571667	0.519333	0.631333	0.572	0.628667	0.530667	0.565667	0.626667	0.418	0.533	0.477333	0.523667	0.550667	0.558333	0.547333	0.595	0.624667	0.528333	0.592667	0.698	0.466667	0.587333
1	fal	1.89233	0.478333	0.514667	0.997333	0.506	0.483	0.812333	0.492333	0.486	0.562667	0.605667	0.497667	0.7	0.509667	0.517667	0.471667	0.533	0.49	0.487	0.517333	0.597667	0.510667	0.441667	0.495
1	viv	1.53033	0.631	0.612	0.809	0.931667	0.813667	1.37667	0.801667	0.661	0.740333	0.497333	0.683	0.811667	0.656333	0.938667	0.642	0.659667	0.599667	0.584	0.525333	0.814667	0.628667	0.478667	0.652
1	ova	0.703	0.424	0.449333	0.446333	0.481333	0.481667	1.155	0.487667	0.699333	0.581667	0.45	0.523333	0.426	0.463667	0.445667	1.22167	0.587333	1.31333	0.471333	0.428333	0.577	0.491333	0.410333	0.436667
1	viv	0.839	0.47	0.471	0.575667	0.501	0.469667	0.480667	0.457	0.451	0.620667	0.793667	0.439667	0.462333	0.462	0.675333	0.457333	0.477333	0.465	0.465333	0.452	0.508	0.491333	0.424333	0.500667
1	viv	0.719333	0.521333	0.535	0.699667	0.660667	0.557333	0.656667	0.921667	0.579	0.691333	0.580667	1.15833	0.680333	0.546	0.521333	0.559667	0.641333	0.515	0.515333	0.534333	0.818	0.561	0.442333	0.557333
1	viv	0.800333	0.471333	0.472	0.463	0.546667	0.49	0.508	0.475333	0.485667	0.468667	0.394	1.55867	0.530667	0.633667	0.464333	0.500333	0.511667	0.501667	0.487667	0.454667	0.509333	0.786	0.414667	0.479667
3	viv	1.50733	0.569	0.553333	0.723667	0.559	0.635333	0.647667	0.706667	0.588	0.485667	0.428333	0.642	0.638333	0.552	0.561333	0.526667	0.532667	0.536667	0.531333	0.647667	0.584333	0.550667	0.465	0.607667
1	viv	1.05967	0.481	0.518	0.519333	0.586333	0.512	0.534	0.716	0.555333	0.636	0.508667	1.214	0.554	0.539	0.520667	0.48	0.606333	0.860333	0.492	0.516333	0.522667	0.713667	0.441667	0.500333
1	viv	0.573	0.529	0.504333	1.25933	0.539667	0.559333	0.595667	0.5	0.509667	0.501333	0.459333	0.574333	0.534	0.719333	0.474	0.510333	0.632667	1.43033	0.529	0.478667	0.552333	0.547667	0.422333	0.534
2	ova	1.05967	0.424333	0.404667	0.444667	0.510333	0.517333	1.104	0.454	0.819667	0.513333	0.422	0.461667	0.494	0.448333	0.440667	0.440667	0.44	0.859	0.435333	0.448	0.466	0.451667	0.420667	0.462667
2	ova	1.09667	1.42733	0.455	0.821667	1.20267	0.45	2.241	0.392333	2.13133	0.901667	0.404667	0.387667	0.909667	0.430333	1.08467	0.398333	0.84	0.861333	0.438	0.413	0.410333	0.646667	0.369333	0.378
1	ova	0.955	0.514	0.492	0.469	0.509	0.491333	0.547667	0.467333	0.485333	0.488667	0.444667	0.821667	0.504667	0.653667	0.513333	0.521333	1.45767	0.481	0.480333	0.569333	0.491333	0.523	0.413	0.467333
2	mal	1.095	1.614	0.677667	0.533333	0.506667	0.638333	1.42167	0.404667	1.378	0.414	0.391333	0.407667	0.427667	1.03333	0.499667	0.517667	0.512	0.416	0.395333	0.427	0.443333	0.402	0.379333	0.402667
4	mal+neg	1.28167	0.392333	0.394667	0.557	0.592333	0.418	0.385333	0.374667	0.383667	0.365667	0.373	0.348667	0.398	0.544333	0.386667	0.379333	0.381667	0.449333	0.377333	0.388667	0.365333	0.376667	0.356	0.373667
4	mal+neg	0.644333	0.957	0.368	0.849333	0.532	0.430667	0.475667	0.388333	0.565333	0.385	0.365	0.362333	0.509	0.441	0.533333	0.514333	0.401667	0.475333	0.376667	0.387667	0.358333	0.392333	0.355	0.390667
4	fal+mal	0.645	0.461	0.394667	0.570333	0.693667	0.394333	0.831667	0.467667	1.02633	0.557	0.379667	0.389667	0.713333	0.706667	0.872	0.655333	0.421667	0.623	0.432333	0.396	0.376	0.390333	0.372333	0.393667
4	mal+neg	0.516333	0.982333	0.362667	1.09967	0.499667	0.626	0.471	0.447333	0.415667	0.501333	0.365667	0.363333	0.415	0.490333	0.384	0.611	0.394333	0.677667	0.417667	0.452	0.352	0.384333	0.386667	0.361667
4	mal+neg	0.651	1.195	0.347667	1.09133	0.499667	0.407333	0.427667	0.337	0.425	0.392333	0.382333	0.366333	0.469667	0.435	0.449667	0.361667	0.388	0.436667	0.375333	0.388333	0.350333	0.373667	0.349	0.375333
4	fal+neg	0.641	0.773333	0.383333	0.498	0.588	0.351667	0.452667	0.381333	0.412667	0.394333	0.366667	0.357	0.413	0.411333	0.413	0.389333	0.468	1.29333	0.996	0.381333	0.43	0.374667	0.366	0.364
4	fal+neg	0.739667	0.404333	0.327333	0.436	0.392667	0.386333	0.432333	0.372333	0.346333	0.343333	0.336333	0.348333	0.372333	0.349667	0.317	0.323333	0.371667	0.363667	0.333	0.358333	0.356333	0.346	0.329	0.362667
4	fal	1.17633	1.27833	1.11733	1.39033	1.30467	1.018	0.967333	0.459	0.711	0.525	0.420667	0.43	0.707667	0.568667	0.858667	0.427333	0.617	0.479	0.474333	0.592333	0.529	0.451667	0.377	0.428667
4	fal+neg	0.682	1.17167	0.338667	1.16	0.585	0.472	0.580333	0.671	0.706	0.889333	0.377333	0.399667	0.435667	0.464667	0.317667	1.00733	0.432	1.106	0.403	0.407	0.414	0.374333	0.393	0.370667
4	fal+neg	0.788333	1.11867	0.411	1.09	0.694	0.678	0.519333	0.335	0.510667	0.408	0.37	0.355	0.396333	0.427	0.314667	0.352667	0.464333	0.402333	0.403	0.469333	0.370667	0.387	0.356667	0.386667
4	fal+ova	0.606667	0.891	0.382667	0.739	0.436667	0.481	0.396333	0.415	0.412667	0.394	0.33	0.356333	0.396333	0.387333	0.379667	0.401667	0.378	0.466	0.398	0.385667	0.368333	0.374333	0.345667	0.355667
4	ova+neg	0.960667	0.494	0.342	0.510333	0.370333	0.435667	0.362	0.366667	0.355667	0.4	0.357667	0.374667	0.358	0.358	0.323	0.401333	0.366667	0.444667	0.358	0.388	0.359333	0.367	0.372667	0.389667
4	ova+neg	0.692667	1.12367	0.345667	0.870333	0.467333	0.43	0.461	0.413	0.484667	0.459	0.370333	0.431667	0.398333	0.456	0.372	0.414	0.399667	0.461	0.457667	0.439667	0.375333	0.440333	0.381333	0.404333
4	ova+neg	0.904	0.799667	0.389333	0.593667	0.417333	0.442667	0.385667	0.422333	0.393667	0.519	0.389333	0.383	0.414333	0.388667	0.38	0.635333	0.402	0.632	0.451333	0.389333	0.367667	0.388	0.375667	0.378
4	fal+ova+neg	0.515667	1.379	0.387667	1.08733	0.464333	0.479333	0.386667	0.375	0.389	0.374333	0.382667	0.359667	0.363333	0.387333	0.333667	0.336667	0.401333	0.367	0.445333	0.393333	0.375333	0.383333	0.347333	0.381667
4	fal+mal+neg	0.660667	1.25967	0.373	0.855667	0.458667	0.358333	0.461	0.372	0.572333	0.373333	0.365667	0.360333	0.421	0.433	0.456	0.469	0.381	0.502	0.397667	0.381	0.384	0.380667	0.398667	0.393667
4	fal+mal	1.04767	0.611333	0.468	0.638	0.686	0.731333	0.86	0.733	0.736333	0.658333	0.414667	0.491667	0.894333	0.891	1.09033	1.07133	0.554	0.979333	0.673667	0.496	0.584667	0.541667	0.426667	0.511333
4	fal+mal+neg	1.10967	1.22433	0.455667	1.20267	0.583333	0.810333	0.532333	0.385667	0.501	0.395333	0.421	0.409667	0.397667	0.476667	0.368667	0.384667	0.476	0.402667	0.416667	0.509667	0.395	0.5	0.397	0.403
4	fal+mal+ova	0.797667	1.02967	0.397667	0.913	0.704667	0.571	0.493333	0.425667	0.468667	0.472333	0.440667	0.439667	0.431	0.581333	0.396667	0.430667	0.500333	0.446667	0.458333	0.544333	0.401	0.538333	0.388667	0.387667
4	fal+mal+ova	0.505333	1.04867	0.367333	0.979667	0.454	0.695667	0.393	0.380667	0.471	0.397	0.384667	0.401333	0.365	0.399333	0.346	0.399	0.38	0.404	0.375	0.414667	0.371	0.406667	0.383667	0.404333
4	fal+mal+ova+neg	0.846333	0.935667	0.380333	0.787667	0.461333	0.499	0.644333	0.477	0.693333	0.664	0.352667	0.384667	0.433333	0.415333	0.407667	0.634	0.381	0.661333	0.374333	0.407667	0.364667	0.411667	0.353667	0.375333
2	mal	0.859333	0.441333	0.430333	0.483333	0.483667	0.534333	1.29567	0.441667	1.006	0.471	0.494333	0.658333	0.491333	0.483333	0.664	0.554	0.553333	0.554	0.587333	0.620333	0.621	0.608	0.515333	0.55
1	ova	0.604	0.471	0.49	0.474	0.469333	0.525333	0.704	0.546333	0.548667	0.540333	0.496	0.628	0.699333	0.518667	0.534667	0.498333	0.532333	0.511667	0.602667	0.597333	0.684333	0.661	0.636333	0.681333
1	mal	1.90667	0.589667	0.529333	0.731	0.639	0.822	2.30333	0.481333	2.002	0.519	0.591333	1.11467	0.560667	0.6	0.942667	0.523333	0.612	0.498333	0.543333	0.577	0.639333	0.596	0.486333	0.544333
1	viv	0.557333	0.430667	0.429333	0.486	0.471333	0.46	0.711	0.510333	0.448667	0.542667	0.437	0.559	0.499	0.487333	0.531	0.52	0.501	0.486667	0.553333	0.568667	0.571667	0.566333	0.519667	0.531
1	viv	1.41467	0.65	0.753	0.816667	0.652333	0.638667	1.83533	1.498	1.57333	1.44067	0.765333	1.67967	0.966333	0.677333	0.935667	0.642333	0.675667	0.67	0.620333	0.561667	0.697333	0.821333	0.447333	0.616
1	ova	2.144	0.712667	0.569	1.414	0.863333	0.557667	2.131	0.551667	1.931	0.55	0.936333	0.874333	0.526667	0.587333	1.02633	0.537	0.816333	0.632	0.530667	0.595	0.533667	0.575	0.440333	0.522667
1	ova	2.186	1.00733	0.507	1.405	0.557333	0.47	2.19933	0.468667	2.05233	0.491	0.447333	1.14133	0.504667	0.577333	0.514333	0.471	1.00633	0.521333	0.488333	0.603333	0.473333	0.478	0.409333	0.467667
1	ova	2.26367	1.055	0.529	1.489	0.585	0.478667	2.19367	0.501667	2.08467	0.507667	0.479667	1.20133	0.534	0.628333	0.550333	0.477333	1.265	0.547667	0.509333	0.699333	0.482667	0.493	0.432333	0.493
1	viv	0.845667	0.658667	0.699667	0.763	0.747	0.643333	0.984333	0.654667	0.713667	0.815667	0.630667	0.841333	0.76	0.989333	0.705	0.684333	0.694667	0.73	0.72	0.611333	0.770333	0.819667	0.525	0.824333
1	ova	1.29733	0.559	0.429667	1.015	0.844667	0.430667	1.23933	0.522667	1.30467	1.092	0.468667	0.599667	0.467	0.607333	0.648667	1.24167	1.30633	1.46033	0.781333	0.641667	0.580667	0.669333	0.388333	0.493333
2	ova	0.678667	0.523333	0.523	0.578667	0.847	0.841	0.66	0.556	0.541667	0.573667	0.499667	0.653667	1.02867	0.668	0.572	0.603333	0.581333	0.603667	0.591667	0.528	0.617667	0.603333	0.461333	0.594
1	viv	0.539667	0.473	0.452	0.471667	0.454667	0.443667	1.40467	0.635333	1.668	0.563333	0.693667	0.617333	0.454	0.511667	0.698	0.464333	0.483	0.493333	0.461667	0.461667	0.532	0.553667	0.407667	0.489333
3	viv	1.116	0.659333	0.624333	0.625333	0.654	0.609	1.52167	1.63133	1.703	0.993333	0.807667	0.766333	0.562333	0.739667	0.720667	0.674	0.557667	0.764	0.61	0.602667	0.880333	0.758333	0.476	0.644333
2	viv	1.16667	0.743667	0.571333	0.694667	0.839	0.592667	1.083	0.719667	1.08267	0.61	1.26233	0.613333	0.659667	0.559	0.612	0.46	0.732333	0.52	0.46	0.712333	0.462	0.508333	0.549	0.454
3	viv	0.528667	0.399333	0.404667	0.409	0.415333	0.412667	0.703	1.74433	0.652333	0.543333	0.481	1.37167	0.434333	0.533667	0.455333	0.425667	0.465667	0.428	0.403	0.400667	0.484333	0.643667	0.374	0.405667
1	viv	0.822667	0.531333	0.535	0.772333	0.581333	0.623	1.012	0.857	0.871	1.27967	0.806333	0.928667	1.09033	0.859333	1.094	0.623667	0.901333	0.61	0.536	1.17667	0.531	0.575	0.425333	0.516333
1	viv	0.655	0.495667	0.483667	0.512667	0.518667	0.504	1.34967	1.11467	1.363	0.517333	0.613	0.842333	0.465	0.609	0.556667	0.464333	0.482333	0.490667	0.493667	0.503333	0.624667	0.699667	0.432	0.541333
3	viv	1.019	2.257	1.01333	1.73167	0.733333	0.455	1.22767	0.398667	1.08333	0.440667	0.421	0.556	0.439667	0.513	0.442333	0.422	0.418333	0.430667	0.415667	0.487667	0.423	0.438333	0.403333	0.427667
3	viv	0.85	0.421333	0.390333	0.45	0.405333	0.399	0.996	1.01833	1.56567	0.44	0.734333	0.740333	0.415	0.551333	0.769	0.406667	0.405333	0.426333	0.414333	0.419667	0.549333	0.533333	0.395	0.418
2	fal	0.967	0.481667	0.455	0.472667	0.474667	0.467	0.818333	0.472333	0.485667	0.477	0.582333	0.769	0.484333	0.490667	0.489667	0.469333	0.475333	0.482333	0.492333	0.538	0.504333	0.505	0.472333	0.508667
1	viv	1.76733	1.58733	0.575667	0.512333	0.603333	0.485	1.63233	1.80933	1.61833	1.492	1.10967	1.23533	0.544667	0.919	0.552	0.573	0.497667	0.793667	0.466333	0.452	1.78267	1.12	0.452333	0.458667
1	fal	0.781667	0.646667	0.562	0.641333	0.550667	0.563	1.08533	0.571333	0.574667	0.62	0.594333	0.994	0.570333	0.652333	0.695333	0.629333	0.7	0.622333	0.838333	0.707333	0.646667	0.604667	0.482333	0.562333
1	fal	1.964	1.55167	0.548	0.869	1.092	0.651	1.38767	0.495333	0.877667	1.30367	0.458	0.618	0.729	0.588	0.549	0.792333	0.577667	0.536667	0.564333	0.774333	0.503667	0.512333	0.431667	0.534667
1	fal	0.934333	0.562	0.706333	0.597667	0.59	0.580667	0.792333	0.585333	0.597667	0.829	0.570333	0.683667	0.643	0.642333	0.608667	0.633667	0.778	0.565667	0.581667	0.576667	0.592333	0.624333	0.529667	0.72
1	fal	1.964	0.781333	0.423667	0.460333	0.543333	0.486	0.555	0.487333	0.480667	0.519	0.825667	0.537333	0.474333	0.512	0.467	0.459667	0.474333	0.493	0.486	0.456333	0.493333	0.436333	0.439	0.474667
1	fal	2.07733	1.617	0.778333	1.59	1.38667	0.573	1.388	0.483	0.683333	0.476667	0.427	0.603	0.477	0.532	0.479667	0.413667	0.508333	0.433333	0.396667	0.532333	0.454	0.417667	0.503667	0.410667
2	mal	0.538	0.414333	0.403	0.494667	0.473	0.392667	1.14967	0.57	0.887667	0.396	0.455333	0.472333	0.398333	1.134	0.723667	0.495	0.523667	0.44	0.408	0.554667	0.424	0.437667	0.405333	0.418333
1	viv	1.175	0.658333	0.738	0.762	0.701	0.687	1.387	1.33333	1.27367	1.35533	0.777333	1.50033	1.017	0.721667	0.936	0.728667	0.708667	0.751	0.706	0.653333	0.783	0.744	0.519	0.712333
1	viv	0.52	0.499	0.493	0.625667	0.608333	0.531333	0.94	0.565	0.509333	0.561	0.503667	0.989667	0.625667	0.666	0.511333	0.52	0.514667	0.520333	0.535667	0.507	0.514667	0.563	0.448333	0.521333
1	viv	0.869667	0.617333	0.516333	0.588333	0.557667	0.529667	0.955	0.519667	0.700667	0.669333	0.489667	0.637333	0.559	0.656333	0.602333	0.567333	0.632	0.557	0.562	0.569333	0.559667	0.574	0.479	0.542333
1	viv	1.24433	0.598	0.561333	0.924333	1.11133	0.617667	1.23267	1.30033	1.15833	1.392	0.782	0.837667	0.791667	0.748333	1.043	0.621667	0.974667	0.624667	0.586333	0.555	0.669667	0.612667	0.459667	0.609667
1	fal	1.39067	0.561333	0.563667	0.535667	0.587333	0.520333	0.764667	0.525333	0.562	0.555667	0.480333	0.608333	0.527	0.585333	0.551333	0.548	0.558667	0.543333	0.562	0.517667	0.577	0.546	0.474333	0.560333
1	fal	1.77667	1.20167	0.636	1.69533	1.069	0.535667	0.869667	0.518667	0.56	0.56	0.565	0.628333	0.788667	0.522333	0.640333	0.490667	0.564	0.481333	0.469667	0.549667	0.497	0.478667	0.469	0.483
1	fal	1.75033	1.42733	0.793333	1.23733	0.769667	0.656667	0.972667	0.508333	0.601333	0.524333	0.469667	0.579	0.572333	0.537	0.633333	0.474333	0.571	0.57	0.466	0.514667	0.484667	0.472667	0.475667	0.465
1	fal	1.067	0.591667	0.579	0.602667	0.652	0.586667	0.752	0.578667	0.613	0.609	0.628667	0.662333	0.586667	0.635	0.675333	0.588	0.632	0.579667	0.583667	0.637333	0.629667	0.631667	0.951333	0.614333
1	fal	0.682333	0.442667	0.448	0.592	0.433	0.428667	0.57	0.429333	0.445667	0.433667	0.422	0.469	0.443333	0.583333	0.767	0.441333	0.464333	0.437	0.441	0.466667	0.449333	0.445333	0.402667	0.441
1	fal	1.91033	1.66433	0.908667	1.63867	1.34233	0.576333	1.427	0.519333	0.75	0.481333	0.448667	0.620667	0.530333	0.551	0.515333	0.422333	0.535333	0.447	0.400333	0.557667	0.454333	0.425	0.509667	0.404333
1	fal	0.541	0.437333	0.405667	0.412	0.449667	0.462667	0.480333	0.409333	0.418667	0.421	0.389667	0.467667	0.394667	0.426667	0.444	0.414	0.414333	0.419667	0.418667	0.415333	0.417	0.428333	0.389667	0.425667
1	fal	0.788333	0.408667	0.517	0.402667	0.418333	0.402333	0.5	0.405667	0.43	0.438333	0.429333	0.471667	0.463	0.851	0.444	0.418667	0.41	0.433667	0.413	0.418	0.413667	0.420667	0.382333	0.417667
1	fal	2.016	0.537	0.545667	0.723667	0.903667	0.553667	0.835333	0.551	0.616667	0.567333	0.491667	0.567	0.575	0.622333	0.564333	0.580667	0.577667	0.568333	0.576667	0.533333	0.582	0.588667	0.475	0.585
1	fal	0.704333	0.472667	0.500667	0.477333	0.508	0.490333	0.581667	0.471667	0.538667	0.503667	0.442	0.485667	0.565	0.493	0.483667	0.486	0.495333	0.486	0.505333	0.856	0.503	0.527333	0.465	0.570333
1	fal	0.694	0.479	0.478	0.460333	0.507333	0.477	0.531	0.476	0.485333	0.510333	0.449333	0.493667	0.444667	0.485333	0.485333	0.488	0.488	0.488	0.497667	0.473333	0.498667	0.502	0.444	0.523667
1	fal	1.23533	0.453333	0.444	0.573333	0.463333	0.455667	0.560333	0.451	0.460667	0.466667	0.470333	0.518	0.497333	0.500667	0.466667	0.465	0.466333	0.457333	0.466333	0.459667	0.48	0.464333	0.416333	0.469667
1	fal	0.547333	0.409	0.408333	0.409333	0.420333	0.409333	0.478667	0.406	0.418	0.416333	0.410333	0.451	0.451667	0.43	0.436	0.418667	0.422333	0.417	0.421	0.405	0.417	0.42	0.383333	0.430333
1	fal	0.966333	0.432	0.435667	0.422667	0.487	0.578	0.858333	0.409	0.417333	0.729333	0.414	0.470667	0.439333	0.447333	0.536	0.416667	0.427333	0.415333	0.414333	0.437333	0.414667	0.416	0.387667	0.412333
1	fal	1.02833	0.567333	0.571333	0.525667	0.529	0.518333	0.706667	0.509	0.539667	0.523667	0.481	0.576	0.542333	0.575	0.531	0.536	0.524333	0.517667	0.533	0.504	0.531333	0.540667	0.458333	0.535333
5	neg	0.573333	0.501	0.526667	0.517	0.533	0.520333	0.615333	0.536667	0.523333	0.441667	0.497	0.453667	0.532	0.499	0.491667	0.496667	0.504667	0.487667	0.477333	0.495	0.660333	0.503	0.442333	0.477
5	neg	0.586	0.427	0.435667	0.516667	0.453667	0.469	0.501667	0.446	0.449333	0.419	0.421	0.421667	0.455667	0.44	0.425667	0.427333	0.465	0.43	0.437333	0.423667	0.500667	0.42	0.380333	0.450667
5	neg	0.592667	0.421667	0.494333	0.599667	0.449	0.437	0.534333	0.416667	0.448667	0.402	0.415333	0.437	0.438333	0.426333	0.427333	0.432333	0.465	0.411333	0.441333	0.408333	0.489333	0.422	0.393333	0.433333
5	neg	0.928333	0.488667	0.655	0.51	0.546	0.473667	0.549333	0.462333	0.487667	0.462333	0.527667	0.527	0.490667	0.475	0.474	0.451333	0.505333	0.514667	0.454667	0.426333	0.548	0.459333	0.400333	0.448667
5	neg	0.867667	0.399667	0.432667	0.440667	0.437	0.402	0.451	0.396333	0.421	0.383	0.401	0.412667	0.416333	0.401667	0.420667	0.413	0.416	0.399	0.399667	0.42	0.442333	0.391	0.377667	0.398333
5	neg	0.534667	0.419	0.429333	0.445333	0.448	0.459333	0.489333	0.427	0.451	0.427667	0.433667	0.424667	0.454333	0.438667	0.438667	0.445667	0.462333	0.443333	0.449333	0.428	0.496	0.452667	0.423	0.453333
5	neg	0.504333	0.387667	0.412333	0.573	0.446333	0.423333	0.458	0.398333	0.411667	0.419667	0.428667	0.431333	0.421333	0.399	0.391667	0.402333	0.425	0.410667	0.412667	0.419	0.457667	0.408667	0.372667	0.412
5	neg	0.818	0.426667	0.446333	0.457333	0.448667	0.427667	0.547667	0.423333	0.433333	0.402333	0.425333	0.449	0.438667	0.430333	0.410333	0.428	0.439333	0.410667	0.424667	0.416	0.481667	0.419333	0.377667	0.413
5	neg	0.469	0.404667	0.422333	0.435333	0.418333	0.402	0.448333	0.407667	0.409667	0.385667	0.406667	0.431	0.419333	0.404	0.405333	0.405667	0.432	0.392667	0.395	0.411667	0.431667	0.399667	0.373333	0.399667
5	neg	0.947333	0.473	0.472333	0.463333	0.461333	0.452333	0.525667	0.486	0.511333	0.413667	0.476667	0.491333	0.463333	0.442	0.451333	0.430333	0.473	0.436667	0.433333	0.436667	0.565333	0.417333	0.388667	0.417
5	neg	0.512667	0.430667	0.446333	0.479	0.442667	0.481333	0.481333	0.438	0.433	0.426	0.439667	0.452	0.429	0.465333	0.431667	0.444	0.453	0.433333	0.437667	0.433333	0.466333	0.447	0.392333	0.439333
5	neg	0.526667	0.404667	0.402667	0.43	0.425667	0.419667	0.514	0.392333	0.427667	0.420333	0.414333	0.417333	0.425333	0.413333	0.383667	0.404333	0.413667	0.373667	0.402333	0.388667	0.424	0.392333	0.363333	0.404333
5	neg	0.814667	0.704333	0.823	0.785	0.845667	0.813	0.831	0.720667	0.773333	0.662333	0.896667	0.508333	0.802	0.829667	0.706667	0.817	0.839667	0.770667	0.783333	0.649667	1.08733	0.817667	0.533667	0.823
5	neg	0.738333	0.637667	0.803667	0.722	0.766	0.722	0.758	0.619667	0.677667	0.574333	0.638	0.498333	0.682333	0.667	1.459	0.688333	0.690667	0.64	0.688333	0.594667	0.904667	0.708333	0.480333	0.707
5	neg	0.613	0.702667	0.872667	0.784667	0.836333	0.805333	0.878333	0.715	0.784667	0.584333	0.897	0.468667	0.748333	0.734667	0.712	0.735333	0.743333	0.731333	0.752	0.597667	0.962333	0.786667	0.503	0.723
5	neg	0.786667	0.436333	0.798	0.431667	0.551333	0.43	0.554333	0.397333	0.446	0.504333	0.417667	0.416333	0.414333	0.395333	0.434	0.41	0.419667	0.398	0.398	0.413667	0.499667	0.402	0.393	0.406333
5	neg	0.47	0.399	0.406667	0.408667	0.428333	0.407333	0.484	0.379333	0.391333	0.391	0.389	0.379667	0.382333	0.385667	0.400333	0.380667	0.375333	0.358333	0.363	0.359333	0.407667	0.383333	0.358667	0.386667
5	neg	0.515667	0.420667	0.419667	0.453667	0.495667	0.419333	0.513333	0.403333	0.435333	0.385667	0.413333	0.415333	0.443333	0.406333	0.498	0.400667	0.436667	0.404667	0.402667	0.397	0.422333	0.410667	0.374667	0.415
5	neg	0.419	0.375667	0.379333	0.39	0.397333	0.402333	0.339667	0.395333	0.399333	0.373	0.385	0.388333	0.387	0.376667	0.383	0.383	0.394667	0.385667	0.371	0.382	0.418333	0.380333	0.361333	0.382667
5	neg	0.455667	0.385333	0.376333	0.390333	0.396333	0.389667	0.401	0.388667	0.394333	0.370333	0.398	0.38	0.410333	0.400667	0.379	0.379333	0.394	0.373333	0.382333	0.379667	0.386333	0.378333	0.362	0.39
5	neg	0.505333	0.426667	0.390667	0.440667	0.404333	0.558667	0.419667	0.379	0.391333	0.374333	0.400333	0.387333	0.392	0.383	0.390333	0.396333	0.387333	0.383667	0.389333	0.4	0.478333	0.383333	0.360667	0.381
5	neg	0.634667	0.383	1.01467	0.403667	0.467	0.391	0.466667	0.355	0.392667	0.462	0.395667	0.383333	0.378667	0.387667	0.407333	0.381333	0.408	0.371667	0.382	0.379333	0.392333	0.395	0.37	0.378333
5	neg	0.825333	0.408667	0.388	0.415333	0.407667	0.400667	0.470333	0.384333	0.41	0.390333	0.398333	0.402667	0.403667	0.404	0.397	0.392667	0.397667	0.391333	0.383667	0.377333	0.396	0.387	0.374333	0.395667
5	neg	0.664	0.496667	0.464	0.441	0.490667	0.404333	0.45	0.475	0.424333	0.390667	0.484667	0.566333	0.420333	0.416333	0.436333	0.409333	0.597	0.405333	0.409333	0.520333	0.419	0.409	0.385333	0.406333
5	neg	0.493333	0.351333	0.382333	0.385	0.391667	0.373667	0.395333	0.385333	0.373	0.433	0.427333	0.373333	0.378	0.391	0.394667	0.377667	0.384	0.371333	0.374333	0.379333	0.373667	0.372667	0.358	0.368667
5	neg	0.643	0.413333	0.421333	0.451	0.433	0.416667	0.449	0.411667	0.425	0.444333	0.411667	0.424333	0.433	0.486667	0.409333	0.407	0.409	0.404667	0.405333	0.404	0.411	0.427333	0.399333	0.401333
5	neg	0.689667	0.422333	0.517333	0.492333	0.432333	0.425667	0.436333	0.445	0.433333	0.526333	0.395	0.443	0.441667	0.449	0.417	0.462333	0.454	0.481667	0.433	0.475333	0.508333	0.440667	0.401	0.438667
5	neg	0.7655	0.545	0.7	0.6015	0.6365	0.592	0.6735	0.584	0.5715	0.6465	0.467	0.587	0.537	0.5855	0.5005	0.54	0.626	0.5515	0.557	0.5295	0.7215	0.555	0.438	0.572
6	kno	0.547333	0.318667	0.387667	0.472667	0.381667	0.364333	0.881	1.256	1.082	1.31	0.482667	1.05467	0.322333	0.477333	0.388	0.460333	0.331333	0.48	0.376333	0.336333	1.32867	0.720667	0.28	0.377667
6	kno	0.440667	0.329667	0.386667	0.558	0.379667	0.379	0.432333	0.413	0.408667	0.783333	0.364667	0.447667	0.334333	0.537333	0.574667	0.345333	0.35	0.398	0.366333	1.58367	0.478	0.405333	0.281333	0.380667
6	kno	1.311	0.543333	0.724333	0.794667	0.574667	0.597667	0.624667	0.538333	0.589333	0.557333	0.6	0.538667	0.489667	0.576667	0.481	0.593	0.504667	0.559667	0.577333	0.470333	0.667333	0.564667	0.401333	0.542333
6	kno	0.879	0.358333	0.370667	0.486667	0.432	0.376333	0.585667	0.430333	0.612	0.361333	0.405	0.413	0.311	0.465333	0.358	0.341	0.403333	0.333667	0.352667	0.589333	1.065	0.468667	0.307	0.354333
6	kno	0.737667	0.458	0.478	0.436667	0.522667	0.507333	0.522333	0.473	0.511333	0.808	0.432333	0.475	0.4	0.485	0.436667	0.493	0.479333	0.467333	0.506333	0.458333	0.511333	0.505	0.361333	0.502
6	kno	1.36067	0.479333	0.466667	0.560333	0.997	0.461	0.806333	0.493333	0.574667	0.62	0.549667	0.496	0.512667	0.587667	0.702667	0.458667	0.493	1.21233	0.471667	1.28533	1.589	0.526667	0.362333	0.481
6	kno	1.242	0.545	0.535667	0.985333	0.659667	0.477667	0.959	0.522667	0.588667	0.498333	0.532667	0.704	0.527667	1.074	0.495667	0.457	0.692	0.495333	0.488333	1.16833	0.662	0.732333	0.395667	0.523667
6	kno	1.88833	0.829667	0.658333	0.894333	0.728667	0.625333	1.021	0.764	0.693	0.733	0.693667	0.613667	0.620333	0.656	0.791	0.571667	0.695667	1.34567	0.631333	0.729667	1.28933	0.684	0.430333	0.637333
6	kno	1.72367	0.479	0.457667	0.593	0.507333	0.465333	0.667	0.559	0.695667	0.493667	0.441	0.612	0.447	0.584	0.432333	0.438	0.510333	0.457667	0.48	0.458	1.35633	0.626	0.371	0.495333
6	kno	1.8	0.556667	0.51	0.724333	0.638	0.493667	0.734333	0.636667	0.640333	0.753667	0.455	0.610333	0.514333	0.565333	0.488667	0.472667	0.521333	0.486333	0.478	0.732	1.02	0.555	0.380333	0.516333
5	neg	0.436333	0.347	0.386667	0.414667	0.381	0.358	0.361	0.366333	0.359667	0.35	0.368333	0.344	0.297667	0.335	0.330667	0.319	0.328333	0.344333	0.338	0.322667	0.353	0.347667	0.375667	0.373667
5	neg	0.331	0.318	0.354333	0.395333	0.361333	0.359333	0.381	0.383667	0.366667	0.362333	0.345333	0.336	0.289333	0.319667	0.290333	0.347333	0.341667	0.334	0.338667	0.315667	0.300333	0.334333	0.259	0.383667
5	neg	0.453667	0.319333	0.371667	0.437	0.384333	0.343667	0.359	0.384333	0.396667	0.437	0.354333	0.375333	0.305333	0.314	0.328333	0.343667	0.338	0.338333	0.329	0.312333	0.321333	0.369667	0.339	0.382667
5	neg	0.357	0.317667	0.361333	0.394	0.376	0.354667	0.421	0.393667	0.406	0.372667	0.407333	0.384	0.307333	0.335667	0.325333	0.341667	0.345	0.371	0.344	0.32	0.368	0.355667	0.303667	0.391333
5	neg	0.440333	0.366667	0.375333	0.380667	0.382	0.364	0.361333	0.382333	0.376333	0.373	0.36	0.383667	0.306333	0.335667	0.351667	0.337333	0.331667	0.324667	0.347333	0.311	0.360667	0.377	0.296	0.386333
5	neg	0.714	0.371	0.409333	0.429333	0.414333	0.355667	0.402	0.389333	0.388	0.38	0.360667	0.373333	0.368	0.479	0.329	0.358667	0.401333	0.383	0.388333	0.397333	0.392	0.412	0.338333	0.407
5	neg	1.13933	0.448	0.417	0.463	0.496333	0.451333	0.432	0.432667	0.459667	0.450667	0.418	0.437667	0.412667	1.27933	0.42	0.394	0.400333	0.487333	0.422	0.401	0.456333	0.460667	0.372	0.459
5	neg	1.01633	0.374333	0.408667	0.443	0.439	0.401667	0.449	0.403	0.423	0.428667	0.383333	0.4	0.374333	0.398	0.382667	0.376333	0.398333	0.394333	0.397667	0.472333	0.388667	0.408667	0.396667	0.409667
5	neg	1.05	0.405	0.419667	0.474667	0.451333	0.470333	0.448333	0.442333	0.431333	0.458	0.457333	0.45	0.411333	0.457333	0.403333	0.418333	0.432667	0.399333	0.416667	0.425667	0.428667	0.424333	0.365333	0.419667
5	neg	0.829333	0.389667	0.395333	0.514	0.42	0.409333	0.447333	0.762667	0.445	0.467667	0.372333	0.399333	0.403333	0.45	0.411	0.401667	0.457	0.397667	0.402667	0.471667	1.297	0.403	0.356	0.406333

## Sheet: Fig4
diagnosis	kno-MSP10	kno-P12	kno-P38	Control
kno	0.336333	1.32867	0.720667	0.377667
kno	1.58367	0.478	0.405333	0.380667
kno	0.470333	0.667333	0.564667	0.542333
kno	0.589333	1.065	0.468667	0.354333
kno	0.458333	0.511333	0.505	0.502
kno	1.28533	1.589	0.526667	0.481
kno	1.16833	0.662	0.732333	0.523667
kno	0.729667	1.28933	0.684	0.637333
kno	0.458	1.35633	0.626	0.495333
kno	0.732	1.02	0.555	0.516333
kno	0.624667	1.07867	0.632	0.630667
kno	0.443667	1.31233	0.479	0.347333
kno	0.476333	1.418	0.454333	0.437667
kno	0.660667	1.08633	0.822	0.857
kno	0.885	0.674667	0.449667	0.469333
kno	0.478333	0.498	0.435333	0.433333
kno	0.806667	0.936	0.682	0.503
kno	0.411	1.093	0.495333	0.379333
kno	0.493	1.08567	0.691333	0.403333
kno	0.490333	0.632	0.446333	0.466667
kno	0.484667	1.063	0.420333	0.380667
kno	0.691667	0.699333	0.467333	0.454333
kno	0.574	0.967667	0.798	0.459667
kno	0.733	0.954333	0.685667	0.645333
kno	0.627333	0.910333	0.783	0.785333
kno	0.410667	1.15	0.535667	0.428333
kno	0.534667	0.781	0.639	0.602667
kno	1.29833	1.133	1.44967	0.465667
kno	0.458333	1.03667	0.732667	0.619333
kno	0.607667	0.901	0.562333	0.509
kno	0.713667	1.53533	0.474667	0.405
kno	0.838	1.25933	0.673667	0.666
kno	1.13267	1.038	0.549667	0.545
kno	1.371	1.33467	1.03133	0.902667
kno	0.442	1.062	0.412667	0.380333
kno	1.036	0.555667	0.490667	0.405333
kno	0.950667	0.489333	0.407333	0.382667
kno	0.501	0.997333	0.708667	0.360667
kno	0.707333	0.585333	1.03667	0.379333
kno	0.660333	1.10033	0.435667	0.344667
kno	0.707	0.829333	0.473667	0.439333
kno	0.594333	1.24467	0.384	0.371333
kno	0.670333	1.15033	0.421	0.356
kno	0.372667	1.08967	0.928333	0.367333
kno	0.526	1.01433	0.387	0.378
kno	0.754333	0.505	0.478667	0.467667
kno	0.580667	0.606667	0.504	0.439667
kno	0.935	1.122	0.778333	0.531667
kno	0.753	1.025	0.397333	0.39
kno	0.545	1.11433	0.825	0.347667
neg	0.322667	0.353	0.347667	0.373667
neg	0.315667	0.300333	0.334333	0.383667
neg	0.471667	1.297	0.403	0.406333
neg	0.312333	0.321333	0.369667	0.382667
neg	0.32	0.368	0.355667	0.391333
neg	0.311	0.360667	0.377	0.386333
neg	0.397333	0.392	0.412	0.407
neg	0.401	0.456333	0.460667	0.459
neg	0.472333	0.388667	0.408667	0.409667
neg	0.425667	0.428667	0.424333	0.419667
neg	0.344333	0.378667	0.369333	0.358
neg	0.362333	0.405667	0.381333	0.380333
neg	0.350333	0.388333	0.388	0.370667
neg	0.349667	0.366667	0.371	0.354333
neg	0.365333	0.390667	0.388333	0.382333
neg	0.356	0.374333	0.370333	0.358667
neg	0.385333	0.406333	0.405667	0.391667
neg	0.401333	0.418333	0.411333	0.406333
neg	0.354	0.38	0.359667	0.346667
neg	0.366	0.394	0.371333	0.374
neg	0.384667	0.394333	0.391333	0.381
neg	0.387667	0.437	0.404	0.392667
neg	0.602333	0.922333	0.582333	0.578333
neg	0.361	0.432333	0.410333	0.408
neg	0.525333	0.819667	0.696667	0.665667
neg	0.364667	0.445333	0.424333	0.436
neg	0.395667	0.536333	0.487667	0.484333
neg	0.355333	0.398	0.373333	0.363
neg	0.401333	0.576333	0.444	0.425667
neg	0.456333	0.624333	0.534667	0.53
neg	0.395333	0.440333	0.403	0.429333
neg	0.522667	0.65	0.567333	0.555667
neg	0.373667	0.467667	0.475667	0.413333
neg	0.469667	0.578	0.529333	0.527667
neg	0.348	0.357333	0.344667	0.342
neg	0.361667	0.356333	0.367667	0.325333
neg	0.353333	0.331667	0.345	0.318
neg	0.343667	0.322333	0.335	0.317
neg	0.357	0.350333	0.345	0.326667
neg	0.343333	0.341	0.346333	0.329333
neg	0.33	0.339	0.351	0.303333
neg	0.353333	0.344333	0.349667	0.330333
neg	0.362333	0.349	0.359667	0.333
neg	0.362333	0.350667	0.355333	0.347667
neg	0.352333	0.380333	0.384667	0.347
neg	0.341667	0.361667	0.341667	0.360667
neg	0.359333	0.332	0.348	0.331667
neg	0.362	0.347	0.392333	0.349667
neg	0.343333	0.332667	0.345667	0.338
neg	0.337333	0.354333	0.365667	0.357
neg	0.373667	0.351667	0.382	0.375333
neg	0.344667	0.326667	0.352333	0.362
neg	0.337667	0.318667	0.335667	0.343333
neg	0.348	0.335667	0.358667	0.339333
neg	0.364333	0.333333	0.365	0.350667
neg	0.338333	0.328	0.347667	0.339
neg	0.363667	0.353667	0.355333	0.345
neg	0.361667	0.338	0.348667	0.327667
neg	0.361667	0.344333	0.380333	0.378333
neg	0.356667	0.369333	0.374667	0.363
neg	0.361	0.371333	0.385667	0.37
neg	0.371333	0.391	0.389667	0.371
neg	0.358333	0.357	0.34	0.352
neg	0.367667	0.338667	0.354333	0.362
neg	0.346	0.345	0.354333	0.353
neg	0.361333	0.367	0.376667	0.368333
